# Supplementary material
Source: publisher figshare collection journal article supplement (https://gsajournals.figshare.com/articles/dataset/_/14758572)
Supplement: Supplementary file 1 [file 1]

**Fig.S1**

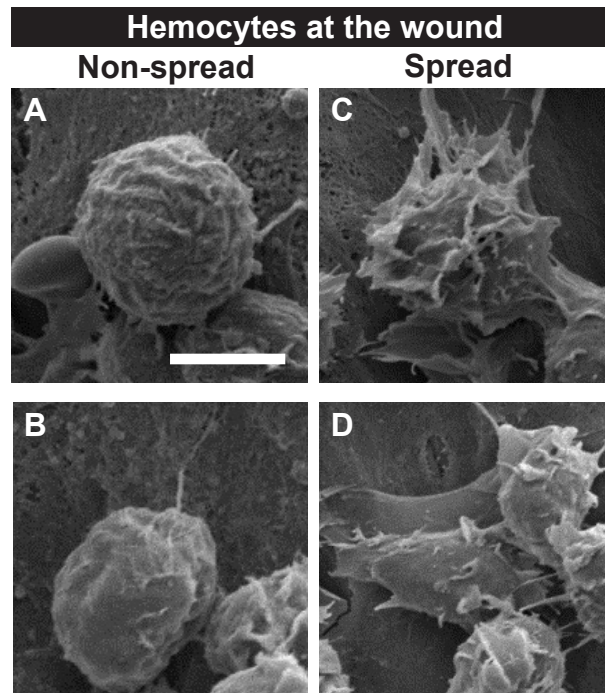

**Figure S1. Representative images of spread and non-spread hemocytes at the wounds.**  
Scale bar in (A) is for (B-D), 5  $\mu\text{m}$ .
