# Supplementary material
Source: publisher figshare collection journal article supplement (https://gsajournals.figshare.com/articles/dataset/_/14758572)
Supplement: Supplementary file 2 [file 1]

**Fig.S4**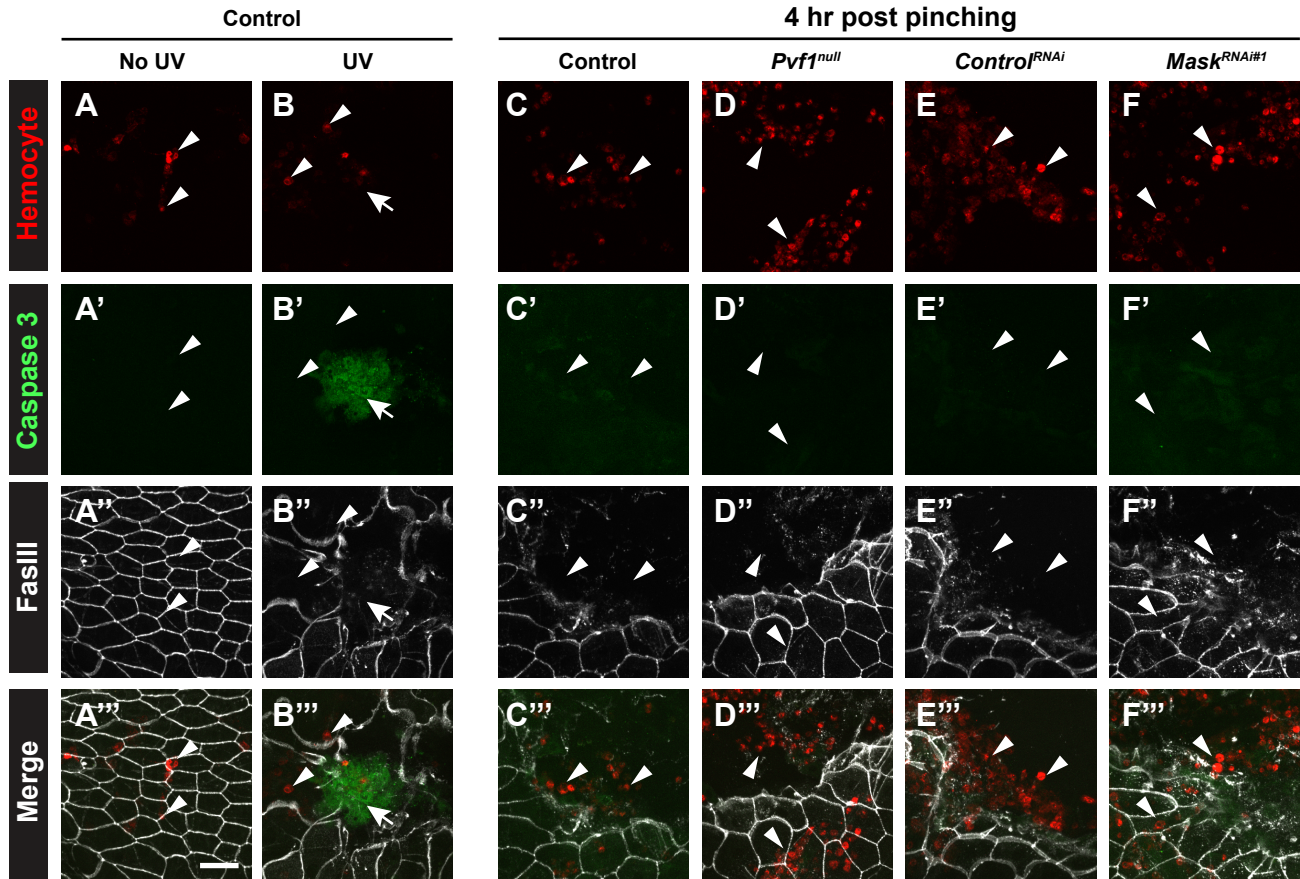**Figure S4. Loss of *Pvf1* or *Mask* does not promote hemocyte apoptosis post wounding.**

(A-F''') Dissected epidermal wholemounts of larvae of the indicated genotypes and conditions. Hemocytes were labeled with red fluorescent protein (*hmlΔ-Gal4, UAS-CD4-TdTom*). Anti-Fasciclin 3 (FasIII, white) and Anti-Activated-Caspase 3 (green) immunostaining were used to visualize epidermal cell boundaries and apoptotic cells, respectively. Strong activated caspase 3 signal in the epidermis 24 h post UV exposure (B-B''', arrow) but not in the mock control (A-A'''). (A-C''') control, (D-D''') *Pvf1<sup>null</sup>*, (E-E''') *Control<sup>RNAi</sup>*, (F-F''') *Mask<sup>RNAi#1</sup>*. Arrowheads, examples of hemocytes without caspase 3 staining. Scale bar in (A''') is for (A-F'''), 50  $\mu$ m.
