# Supplementary material
Source: publisher figshare collection journal article supplement (https://gsajournals.figshare.com/articles/dataset/_/14758572)
Supplement: Supplementary file 3 [file 1]

**Fig.S3**

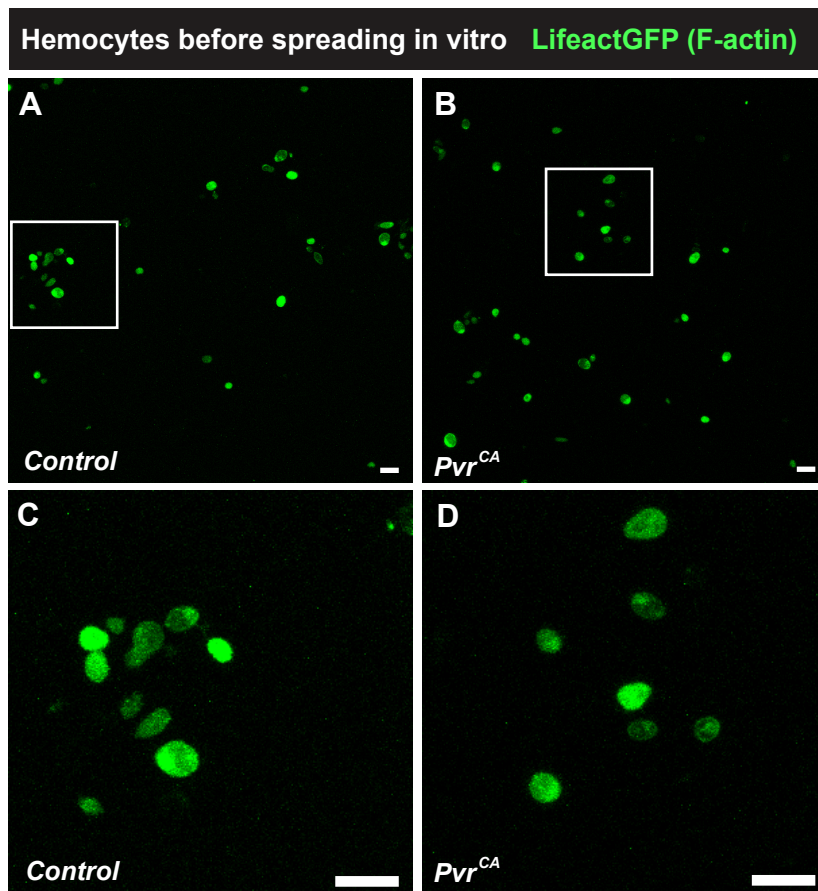

**Figure S3. Representative images of control and gain-of-Pvr hemocyte morphology before spreading.** (A,C) *Control*. (B,D) *UAS-Pvr<sup>CA</sup>*. (C,D) Closeup images of white boxes in (A) and (B), respectively. Scale bar in (A-D), 10  $\mu$ m.
