# Supplementary material
Source: publisher figshare collection journal article supplement (https://gsajournals.figshare.com/articles/dataset/_/14758572)
Supplement: Supplementary file 5 [file 1]

### Table S1. Flies used in this study

Please note the genotype of sex chromosome is simplified. The actual genotypes for the sex chromosome could be mixed, depending on the source RNAi collection, UAS transgenes, and larvae of both sexes were pooled and tested if not indicate.

Fig. panels – genotypes tested:

#### Fig. 1.

(B)  $w^{1118}$  control.

(C)  $Pvr^{hypo/null}$ .

(D)  $Pvf3^{null}$ .

(E)  $Pvf2^{hypo}$ .

(F)  $Pvf1^{null}$ .

(G)  $w^{1118}$  control.

(H)  $Pvf1^{null}$ .

(I)  $w^{1118}$  control,  $Pvf1^{null}$ .

#### Fig. 2.

(B)  $hml\Delta-Gal4$ ,  $UAS-GFP/+$ .

(C)  $hml\Delta-Gal4$ ,  $UAS-GFP/UAS-Pvr^{RNAi\#2}$ .

(D)  $hml\Delta Gal4$ ,  $UAS-LifeActGFP/+$ ;  $UAS-Luciferase^{RNAi}/+$ .

(E)  $hml\Delta Gal4$ ,  $UAS-LifeActGFP/+$ ;  $UAS-Pvr^{CA}/UAS-Luciferase^{RNAi}$ .

(F)  $hml\Delta Gal4$ ,  $UAS-LifeActGFP/+$ ,  $UAS-Pvr^{CA}/UAS-Pvr^{RNAi\#1}$ .

(G) as (D-F).

(H)  $hml\Delta Gal4$ ,  $UAS-LifeActGFP/UAS-LacZ$  and  $hml\Delta Gal4$ ,  $UAS-LifeActGFP/UAS-Pvr^{CA}$ .

**Fig. 3.** Genotypes are indicated in the figure.

**Fig. 4.**

(A) *e22c-Gal4, UAS-dsRed2Nuc, UAS-src-GFP/+; UAS-Luciferase<sup>RNAi</sup>/+.*

(B) *e22c-Gal4, UAS-dsRed2Nuc, UAS-src-GFP/+; UAS-Pvr<sup>RNAi#1</sup>/+.*

(C) *e22c-Gal4, UAS-dsRed2Nuc, UAS-src-GFP/UAS-Ras<sup>RNAi#1</sup>.*

(D) *e22c-Gal4, UAS-dsRed2Nuc, UAS-src-GFP/+; UAS-Mask<sup>RNAi#1</sup>/+.*

(E) *e22c-Gal4, UAS-dsRed2Nuc, UAS-src-GFP/UAS-MKK3<sup>RNAi#2</sup>.*

(F) as (A-E).

(G) *UAS-LacZ/UAS-Pvr<sup>RNAi#2</sup>; A58-Gal4, UAS-dsRed2Nuc, UAS-src-GFP/+.*

(H) *UAS-Pvr/UAS-Pvr<sup>RNAi#2</sup>; A58-Gal4, UAS-dsRed2Nuc, UAS-src-GFP/+.*

(I) *UAS-Ras/UAS-Pvr<sup>RNAi#2</sup>; A58-Gal4, UAS-dsRed2Nuc, UAS-src-GFP/+.*

(J) *UAS-MKK3/+ or Y; UAS-Pvr<sup>RNAi#2</sup>/+; A58-Gal4, UAS-dsRed2Nuc, UAS-src-GFP/+.*

(K) as (G-J).

**Fig. 5.**

(B) *hml Δ-Gal4, UAS-LifeactGFP/+; UAS-Pvr<sup>CA</sup>/UAS-Luciferase<sup>RNAi</sup>.*

(C) *hml Δ-Gal4, UAS-LifeactGFP/+; UAS-Pvr<sup>CA</sup>/UAS-Akt<sup>RNAi</sup>.*

(D) *hml Δ-Gal4, UAS-LifeactGFP/+; UAS-Pvr<sup>CA</sup>/UAS-Mask<sup>RNAi#1</sup>.*

(E) as (B) and (C).

(F)

- *hml Δ-Gal4, UAS-LifeactGFP/+; UAS-Pvr<sup>CA</sup>/UAS-Luciferase<sup>RNAi</sup>.*
- *hml Δ-Gal4, UAS-LifeactGFP; UAS-Pvr<sup>CA</sup>/UAS-Mask<sup>RNAi#1</sup>.*

- *hml Δ-Gal4, UAS-LifeactGFP/ UAS-Mask<sup>RNAi#2</sup>; UAS-Pvr<sup>CA</sup>/+*.
- (G)
- *hml Δ-Gal4, UAS-LifeactGFP/+; UAS-Pvr<sup>CA</sup>/UAS-Luciferase<sup>RNAi</sup>.*
  - *hml Δ-Gal4, UAS-LifeactGFP/UAS-MKK3<sup>RNAi#1, #2, or #3</sup>; UAS-Pvr<sup>CA</sup>/+*.
- (H)
- *hml Δ-Gal4, UAS-LifeactGFP/+; UAS-Pvr<sup>CA</sup>/UAS-Luciferase<sup>RNAi</sup>.*
  - *hml Δ-Gal4, UAS-LifeactGFP; UAS-Pvr<sup>CA</sup>/UAS-Ckl1α<sup>RNAi#1 or #2</sup>.*
- (I)
- *hml Δ-Gal4, UAS-LifeactGFP/+; UAS-Pvr<sup>CA</sup>/UAS-Luciferase<sup>RNAi</sup>.*
  - *UAS-Ras<sup>DN/+</sup> or Y; hml Δ-Gal4, UAS-LifeactGFP/+; UAS-Pvr<sup>CA</sup>/+*
  - *hml Δ-Gal4, UAS-LifeactGFP/ UAS-Ras<sup>RNAi#1</sup>; UAS-Pvr<sup>CA</sup>*
  - *hml Δ-Gal4, UAS-LifeactGFP/+; UAS-Pvr<sup>CA</sup>/UAS-Ras<sup>RNAi#2, or #3</sup>*
- (J)
- *hml Δ-Gal4, UAS-LifeactGFP/+; UAS-Luciferase<sup>RNAi/+</sup>.*
  - *hml Δ-Gal4, UAS-LifeactGFP/+; UAS-Pvr<sup>RNAi#1/+</sup>.*
  - *hml Δ-Gal4, UAS-LifeactGFP/+; UAS-Akt<sup>RNAi/+</sup>.*
  - *hml Δ-Gal4, UAS-LifeactGFP/+; UAS-Mask<sup>RNAi#1/+</sup>.*
  - *hml Δ-Gal4, UAS-LifeactGFP/UAS-Ras<sup>RNAi#1</sup>.*
  - *hml Δ-Gal4, UAS-LifeactGFP/+; UAS-Ckl1α<sup>RNAi#1/+</sup>.*
  - *hml Δ-Gal4, UAS-LifeactGFP/UAS-MKK3<sup>RNAi#1</sup>.*

**Fig. 6.**

(A,D) *hml Δ-Gal4, UAS-LifeactGFP/+; UAS-Luciferase<sup>RNAi/+</sup>.*

(B,E) *hml Δ-Gal4, UAS-LifeactGFP/+; UAS-Mask<sup>RNAi#1</sup>/+*.

(C) *hml Δ-Gal4, UAS-LifeactGFP/+; UAS-Akt<sup>RNAi</sup>/+*.

(F) as (A) and (B).

**Fig. S1.**

(A-D) *w<sup>1118</sup>*.

**Fig. S2.**

(B,B') *w<sup>1118</sup>; hmlΔ-Gal4, UAS-GFP*

(C,C') *hmlΔ-Gal4, UAS-GFP/UAS-Pvr<sup>RNAi#2</sup>*.

**Fig. S3.**

(A,C) *hmlΔ-Gal4, UAS-LifeActGFP/UAS-LacZ*.

(B,D) *hmlΔ-Gal4, UAS-LifeActGFP/UAS-Pvr<sup>CA</sup>*.

**Fig. S4.**

(A-B''') *hmlΔ-Gal4, UAS-CD4-TdTom/+* (did not select sexes)

(C-C''') *hmlΔ-Gal4, UAS-CD4-TdTom/+* (female)

(D-D''') *Pvf1<sup>null</sup>; hmlΔ-Gal4, UAS-CD4-TdTom/+* (female)

(E-E''') *hmlΔ-Gal4, UAS-CD4-TdTom/UAS-Luciferase<sup>RNAi</sup>* (female)

(F-F''') *hmlΔ-Gal4, UAS-CD4-TdTom/UAS-Mask<sup>RNAi#1</sup>* (female)
